# Supplementary material
Source: publisher figshare collection journal article supplement (https://gsapubs.figshare.com/articles/dataset/_/24595647)
Supplement: Supplementary file 1 [file 1]

## Sheet: StructuralData_All
localityName	x	y	latitude	longitude	altitude	horiz_precision	vert_precision	planeType	dip	dipAzimuth	strike	declination	rockUnit	timedate	notes	Location	Joint set	persistence [m]	spacing [m]	roughness	aperture [mm]
Locality 17	731516	5.31798e+06	-42.256	173.807	48.5971	8	3.26708	Joint	68	187	97	23.418	Unit 2	Thu Dec 9 09:29:51 2021		Stream	J1	3	0.5	stepped smooth	closed
Locality 17	731516	5.31798e+06	-42.256	173.807	48.5971	8	3.26708	Joint	65	200	110	23.418	Unit 2	Thu Dec 9 09:29:47 2021		Stream	J1	3	0.5	stepped smooth	closed
Locality 17	731516	5.31798e+06	-42.256	173.807	48.5971	8	3.26708	Joint	43	196	106	23.418	Unit 2	Thu Dec 9 09:29:42 2021		Stream	J1	3	0.5	stepped smooth	closed
Locality 17	731516	5.31798e+06	-42.256	173.807	48.5971	8	3.26708	Joint	76	169	79	23.418	Unit 2	Thu Dec 9 09:28:44 2021		Stream	J1	3	0.5	stepped smooth	closed
Locality 17	731516	5.31798e+06	-42.256	173.807	48.5971	8	3.26708	Joint	79	121	31	23.418	Unit 2	Thu Dec 9 09:28:32 2021		Stream	J3	0.5	0.2	stepped smooth	closed
Locality 17	731516	5.31798e+06	-42.256	173.807	48.5971	8	3.26708	Joint	77	103	13	23.418	Unit 2	Thu Dec 9 09:28:26 2021		Stream	J3	0.5	0.2	stepped smooth	closed
Locality 17	731516	5.31798e+06	-42.256	173.807	48.5971	8	3.26708	Joint	50	49	319	23.418	Unit 2	Thu Dec 9 09:27:00 2021		Stream	J2	1	0.2	undulating smooth	1
Locality 17	731516	5.31798e+06	-42.256	173.807	48.5971	8	3.26708	Joint	51	63	333	23.418	Unit 2	Thu Dec 9 09:26:21 2021		Stream	J2	1	0.2	undulating smooth	1
Locality 17	731516	5.31798e+06	-42.256	173.807	48.5971	8	3.26708	Joint	62	67	337	23.418	Unit 2	Thu Dec 9 09:26:15 2021		Stream	J2	1	0.2	undulating smooth	1
Locality 17	731516	5.31798e+06	-42.256	173.807	48.5971	8	3.26708	Joint	55	68	338	23.418	Unit 2	Thu Dec 9 09:26:09 2021		Stream	J2	1	0.2	undulating smooth	1
Locality 17	731516	5.31798e+06	-42.256	173.807	48.5971	8	3.26708	Joint	66	57	327	23.418	Unit 2	Thu Dec 9 09:26:05 2021		Stream	J2	1	0.2	undulating smooth	1
Locality 17	731516	5.31798e+06	-42.256	173.807	48.5971	8	3.26708	Cleavage	81	141	51	23.418	Unit 2	Thu Dec 9 09:25:37 2021	Shear	Stream	J1	3	0.5	stepped smooth	closed
Locality 17	731516	5.31798e+06	-42.256	173.807	48.5971	8	3.26708	Cleavage	71	328	238	23.418	Unit 2	Thu Dec 9 09:25:11 2021	Shear	Stream	J1	3	0.5	stepped smooth	closed
Locality 17	731516	5.31798e+06	-42.256	173.807	48.5971	8	3.26708	Cleavage	73	162	72	23.418	Unit 2	Thu Dec 9 09:23:59 2021	Shear	Stream	J1	3	0.5	stepped smooth	closed
Locality 17	731516	5.31798e+06	-42.256	173.807	48.5971	8	3.26708	Cleavage	82	186	96	23.418	Unit 2	Thu Dec 9 09:23:54 2021	Shear	Stream	J1	3	0.5	stepped smooth	closed
Locality 17	731516	5.31798e+06	-42.256	173.807	48.5971	8	3.26708	Cleavage	64	171	81	23.418	Unit 2	Thu Dec 9 09:23:46 2021	Shear	Stream	J1	3	0.5	stepped smooth	closed
Locality 17	731516	5.31798e+06	-42.256	173.807	48.5971	8	3.26708	Cleavage	67	173	83	23.418	Unit 2	Thu Dec 9 09:23:41 2021	Shear	Stream	J1	3	0.5	stepped smooth	closed
Locality 16	731516	5.31798e+06	-42.256	173.807	48.5971	8	3.26708	Joint	54	155	65	23.418	Unit 2	Thu Dec 9 09:09:58 2021		Stream	J5	0.1	0.5	planar smooth	closed
Locality 16	731516	5.31798e+06	-42.256	173.807	48.5971	8	3.26708	Joint	51	185	95	23.418	Unit 2	Thu Dec 9 09:09:41 2021		Stream	J5	0.1	0.5	planar smooth	closed
Locality 16	731516	5.31798e+06	-42.256	173.807	48.5971	8	3.26708	Joint	89	101	11	23.418	Unit 2	Thu Dec 9 09:08:20 2021		Stream	J4	2	0.1	planar smooth	2
Locality 16	731516	5.31798e+06	-42.256	173.807	48.5971	8	3.26708	Joint	84	282	192	23.418	Unit 2	Thu Dec 9 09:08:14 2021		Stream	J4	2	0.1	planar smooth	2
Locality 16	731516	5.31798e+06	-42.256	173.807	48.5971	8	3.26708	Joint	82	295	205	23.418	Unit 2	Thu Dec 9 09:08:08 2021		Stream	J4	2	0.1	planar smooth	2
Locality 16	731516	5.31798e+06	-42.256	173.807	48.5971	8	3.26708	Joint	89	116	26	23.418	Unit 2	Thu Dec 9 09:08:03 2021		Stream	J4	2	0.1	planar smooth	2
Locality 16	731516	5.31798e+06	-42.256	173.807	48.5971	8	3.26708	Joint	38	355	265	23.418	Unit 2	Thu Dec 9 09:06:24 2021		Stream	J3	4	0.1	planar smooth	closed
Locality 16	731516	5.31798e+06	-42.256	173.807	48.5971	8	3.26708	Joint	39	355	265	23.418	Unit 2	Thu Dec 9 09:06:04 2021		Stream	J3	4	0.1	planar smooth	closed
Locality 16	731516	5.31798e+06	-42.256	173.807	48.5971	8	3.26708	Joint	39	321	231	23.418	Unit 2	Thu Dec 9 09:05:57 2021		Stream	J3	4	0.1	planar smooth	closed
Locality 16	731516	5.31798e+06	-42.256	173.807	48.5971	8	3.26708	Joint	72	294	204	23.418	Unit 2	Thu Dec 9 09:05:50 2021		Stream	J3	4	0.1	planar smooth	closed
Locality 16	731516	5.31798e+06	-42.256	173.807	48.5971	8	3.26708	Cleavage	57	86	356	23.418	Unit 2	Thu Dec 9 09:04:44 2021		Stream	J2	1.5	0.3	planar smooth	closed
Locality 16	731516	5.31798e+06	-42.256	173.807	48.5971	8	3.26708	Cleavage	49	73	343	23.418	Unit 2	Thu Dec 9 09:04:35 2021		Stream	J2	1.5	0.3	planar smooth	closed
Locality 16	731516	5.31798e+06	-42.256	173.807	48.5971	8	3.26708	Cleavage	45	79	349	23.418	Unit 2	Thu Dec 9 09:04:29 2021		Stream	J2	1.5	0.3	planar smooth	closed
Locality 16	731516	5.31798e+06	-42.256	173.807	48.5971	8	3.26708	Cleavage	43	77	347	23.418	Unit 2	Thu Dec 9 09:04:23 2021		Stream	J2	1.5	0.3	planar smooth	closed
Locality 16	731516	5.31798e+06	-42.256	173.807	48.5971	8	3.26708	Joint	59	225	135	23.418	Unit 2	Thu Dec 9 09:03:17 2021		Stream	J1	1	0.1	stepped rough	2
Locality 16	731516	5.31798e+06	-42.256	173.807	48.5971	8	3.26708	Joint	73	216	126	23.418	Unit 2	Thu Dec 9 09:03:12 2021		Stream	J1	1	0.1	stepped rough	2
Locality 16	731516	5.31798e+06	-42.256	173.807	48.5971	8	3.26708	Joint	58	239	149	23.418	Unit 2	Thu Dec 9 09:03:04 2021		Stream	J1	1	0.1	stepped rough	2
Locality 16	731516	5.31798e+06	-42.256	173.807	48.5971	8	3.26708	Joint	63	230	140	23.418	Unit 2	Thu Dec 9 09:02:59 2021		Stream	J1	1	0.1	stepped rough	2
Locality 15	731516	5.31798e+06	-42.256	173.807	48.5971	8	3.26708	Joint	48	277	187	23.418	Unit 2	Thu Dec 9 08:54:59 2021		Stream	J4	1	0.2	undulating rough	2
Locality 15	731516	5.31798e+06	-42.256	173.807	48.5971	8	3.26708	Joint	55	279	189	23.418	Unit 2	Thu Dec 9 08:54:44 2021		Stream	J4	1	0.2	undulating rough	2
Locality 15	731516	5.31798e+06	-42.256	173.807	48.5971	8	3.26708	Joint	65	342	252	23.418	Unit 2	Thu Dec 9 08:52:56 2021		Stream	J3	1	0.5	planar stepped	2
Locality 15	731516	5.31798e+06	-42.256	173.807	48.5971	8	3.26708	Joint	45	329	239	23.418	Unit 2	Thu Dec 9 08:52:35 2021		Stream	J3	1	0.5	planar stepped	2
Locality 15	731516	5.31798e+06	-42.256	173.807	48.5971	8	3.26708	Joint	63	173	83	23.418	Unit 2	Thu Dec 9 08:51:07 2021		Stream	J2	2	0.2	undulating smooth	2
Locality 15	731516	5.31798e+06	-42.256	173.807	48.5971	8	3.26708	Joint	52	181	91	23.418	Unit 2	Thu Dec 9 08:50:46 2021		Stream	J2	2	0.2	undulating smooth	2
Locality 15	731516	5.31798e+06	-42.256	173.807	48.5971	8	3.26708	Joint	78	68	338	23.418	Unit 2	Thu Dec 9 08:50:24 2021		Stream	J1	1	0.15	planar smooth	closed
Locality 15	731516	5.31798e+06	-42.256	173.807	48.5971	8	3.26708	Joint	56	36	306	23.418	Unit 2	Thu Dec 9 08:47:58 2021		Stream	J1	1	0.15	planar smooth	closed
Locality 15	731516	5.31798e+06	-42.256	173.807	48.5971	8	3.26708	Joint	62	69	339	23.418	Unit 2	Thu Dec 9 08:47:35 2021		Stream	J1	1	0.15	planar smooth	closed
Locality 14	731516	5.31798e+06	-42.256	173.807	48.5971	8	3.26708	Cleavage	65	79	349	23.418	Unit 2	Thu Dec 9 08:43:12 2021		Stream	J2	30	0.5	undulating smooth	closed
Locality 14	731516	5.31798e+06	-42.256	173.807	48.5971	8	3.26708	Cleavage	35	95	5	23.418	Unit 2	Thu Dec 9 08:42:12 2021		Stream	J2	30	0.5	undulating smooth	closed
Locality 14	731518	5.31798e+06	-42.256	173.807	47.2125	6	3.77212	Cleavage	35	97	7	23.418	Unit 2	Thu Dec 9 08:41:39 2021		Stream	J2	30	0.5	undulating smooth	closed
Locality 14	731520	5.31798e+06	-42.256	173.807	46.6816	8	4.36329	Cleavage	31	93	3	23.418	Unit 2	Thu Dec 9 08:41:19 2021		Stream	J2	30	0.5	undulating smooth	closed
Locality 14	731516	5.31798e+06	-42.256	173.807	49.8445	12	6.94097	Cleavage	34	81	351	23.418	Unit 2	Thu Dec 9 08:40:35 2021		Stream	J2	30	0.5	undulating smooth	closed
Locality 14	731517	5.31798e+06	-42.256	173.807	51.4658	8	7.84241	Cleavage	36	55	325	23.418	Unit 2	Thu Dec 9 08:40:23 2021		Stream	J2	30	0.5	undulating smooth	closed
Locality 14	731510	5.31796e+06	-42.2562	173.807	52.1382	4	3	Joint	75	120	30	23.418	Unit 2	Thu Dec 9 08:34:31 2021	slickensides	Stream	J4	3	1.5	undulating smooth	1
Locality 14	731511	5.31796e+06	-42.2562	173.807	52.1858	6	3.19012	Joint	89	302	212	23.418	Unit 2	Thu Dec 9 08:33:54 2021		Stream	J3	3	0.1	planar rough	2
Locality 14	731510	5.31796e+06	-42.2562	173.807	52.02	6	3.29501	Joint	89	269	179	23.418	Unit 2	Thu Dec 9 08:33:47 2021		Stream	J3	3	0.1	planar rough	2
Locality 14	731514	5.31796e+06	-42.2562	173.807	52.3045	6	3	Joint	56	321	231	23.418	Unit 2	Thu Dec 9 08:32:13 2021		Stream	J3	3	0.1	planar rough	2
Locality 14	731511	5.31796e+06	-42.2562	173.807	51.3366	6	3.06533	Joint	67	334	244	23.418	Unit 2	Thu Dec 9 08:31:51 2021		Stream	J3	3	0.1	planar rough	2
Locality 14	731511	5.31796e+06	-42.2562	173.807	52.9244	6	3	Joint	47	346	256	23.418	Unit 2	Thu Dec 9 08:31:24 2021		Stream	J3	3	0.1	planar rough	2
Locality 14	731511	5.31796e+06	-42.2562	173.807	52.3988	6	3.13443	Joint	54	9	279	23.418	Unit 2	Thu Dec 9 08:31:09 2021		Stream	J3	3	0.1	planar rough	2
Locality 14	731511	5.31796e+06	-42.2562	173.807	51.6519	6	3.33484	Joint	55	336	246	23.418	Unit 2	Thu Dec 9 08:30:56 2021		Stream	J3	3	0.1	planar rough	2
Locality 14	731512	5.31796e+06	-42.2562	173.807	51.6184	6	3.8344	Joint	42	323	233	23.418	Unit 2	Thu Dec 9 08:30:46 2021		Stream	J3	3	0.1	planar rough	2
Locality 14	731513	5.31796e+06	-42.2562	173.807	53.1336	6	3	Joint	75	260	170	23.418	Unit 2	Thu Dec 9 08:28:06 2021		Stream	J1	1.5	0.1	planar rough	1
Locality 14	731512	5.31796e+06	-42.2562	173.807	53.2695	6	3	Joint	79	278	188	23.418	Unit 2	Thu Dec 9 08:27:53 2021		Stream	J1	1.5	0.1	planar rough	1
Locality 14	731512	5.31796e+06	-42.2562	173.807	53.3684	6	3.17413	Joint	79	260	170	23.418	Unit 2	Thu Dec 9 08:27:47 2021		Stream	J1	1.5	0.1	planar rough	1
Locality 14	731512	5.31796e+06	-42.2562	173.807	53.1922	4	3.32216	Joint	72	258	168	23.418	Unit 2	Thu Dec 9 08:27:42 2021		Stream	J1	1.5	0.1	planar rough	1
Locality 14	731513	5.31797e+06	-42.2562	173.807	53.7652	6	3.87795	Joint	78	251	161	23.418	Unit 2	Thu Dec 9 08:27:34 2021		Stream	J1	1.5	0.1	planar rough	1
Locality 14	731514	5.31797e+06	-42.2562	173.807	53.4271	6	4.09827	Joint	75	258	168	23.418	Unit 2	Thu Dec 9 08:27:29 2021		Stream	J1	1.5	0.1	planar rough	1
Locality 14	731515	5.31796e+06	-42.2562	173.807	54.418	6	4.55306	Cleavage	46	91	1	23.418	Unit 2	Thu Dec 9 08:27:03 2021		Stream	J2	30	0.5	undulating smooth	closed
Locality 14	731515	5.31796e+06	-42.2562	173.807	55.1479	6	5.03681	Cleavage	55	106	16	23.418	Unit 2	Thu Dec 9 08:26:54 2021		Stream	J2	30	0.5	undulating smooth	closed
Locality 14	731516	5.31796e+06	-42.2563	173.807	52.5293	6	4.69526	Cleavage	47	116	26	23.418	Unit 2	Thu Dec 9 08:26:23 2021		Stream	J2	30	0.5	undulating smooth	closed
Locality 14	731515	5.31796e+06	-42.2562	173.807	50.3188	6	3.4821	Cleavage	45	120	30	23.418	Unit 2	Thu Dec 9 08:25:43 2021		Stream	J2	30	0.5	undulating smooth	closed
Locality 14	731516	5.31796e+06	-42.2562	173.807	50.3396	8	3.09465	Cleavage	54	116	26	23.418	Unit 2	Thu Dec 9 08:25:31 2021		Stream	J2	30	0.5	undulating smooth	closed
Locality 14	731516	5.31796e+06	-42.2562	173.807	50.5235	6	3.24171	Cleavage	45	152	62	23.418	Unit 2	Thu Dec 9 08:25:22 2021		Stream	J2	30	0.5	undulating smooth	closed
Locality 14	731515	5.31796e+06	-42.2562	173.807	50.871	6	3.32237	Cleavage	51	76	346	23.418	Unit 2	Thu Dec 9 08:24:37 2021		Stream	J2	30	0.5	undulating smooth	closed
Locality 14	731516	5.31796e+06	-42.2562	173.807	51.2483	6	3.59642	Cleavage	53	103	13	23.418	Unit 2	Thu Dec 9 08:24:30 2021		Stream	J2	30	0.5	undulating smooth	closed
Locality 14	731514	5.31796e+06	-42.2562	173.807	50.449	6	3	Cleavage	62	114	24	23.418	Unit 2	Thu Dec 9 08:24:21 2021		Stream	J2	30	0.5	undulating smooth	closed
Locality 14	731515	5.31796e+06	-42.2562	173.807	50.2296	6	3	Cleavage	55	90	0	23.418	Unit 2	Thu Dec 9 08:24:14 2021		Stream	J2	30	0.5	undulating smooth	closed
Locality 14	731516	5.31796e+06	-42.2562	173.807	49.6915	6	3	Cleavage	29	118	28	23.418	Unit 2	Thu Dec 9 08:24:07 2021		Stream	J2	30	0.5	undulating smooth	closed
Locality 13	731482	5.31809e+06	-42.255	173.806	64.7297	6	3.29785	Bedding	47	32	302	23.418	Unit 2	Wed Dec 8 14:10:28 2021	Bedding	Stream	S0	10	obscured	planar smooth	closed
Locality 13	731482	5.31809e+06	-42.255	173.806	63.8565	4	3.33551	Bedding	47	35	305	23.418	Unit 2	Wed Dec 8 14:10:23 2021	Bedding	Stream	S0	10	obscured	planar smooth	closed
Locality 13	731484	5.31809e+06	-42.255	173.806	61.8803	6	3.47045	Bedding	44	46	316	23.418	Unit 2	Wed Dec 8 14:10:10 2021	Bedding	Stream	S0	10	obscured	planar smooth	closed
Locality 13	731490	5.31809e+06	-42.255	173.806	58.0826	6	3	Bedding	59	5	275	23.418	Unit 2	Wed Dec 8 14:08:50 2021	Bedding	Stream	S0	10	obscured	planar smooth	closed
Locality 13	731487	5.31809e+06	-42.255	173.806	58.8951	6	3	Bedding	53	277	187	23.418	Unit 2	Wed Dec 8 14:08:24 2021	Bedding	Stream	S0	10	obscured	planar smooth	closed
Locality 13	731489	5.31809e+06	-42.255	173.806	57.5017	6	3	Bedding	49	21	291	23.418	Unit 2	Wed Dec 8 14:08:07 2021	Bedding	Stream	S0	10	obscured	planar smooth	closed
Locality 13	731485	5.31811e+06	-42.2549	173.806	56.3138	8	5.21935	Joint	68	277	187	23.418	Unit 2	Wed Dec 8 14:05:41 2021		Stream	J3	1.5	0.5	stepped irregular	obscured
Locality 13	731486	5.31811e+06	-42.2549	173.806	57.604	8	5.51164	Joint	58	282	192	23.418	Unit 2	Wed Dec 8 14:05:31 2021		Stream	J3	1.5	0.5	stepped irregular	obscured
Locality 13	731485	5.31811e+06	-42.2549	173.806	55.4443	8	5.58692	Joint	65	259	169	23.418	Unit 2	Wed Dec 8 14:05:23 2021		Stream	J3	1.5	0.5	stepped irregular	obscured
Locality 13	731488	5.31811e+06	-42.2549	173.806	56.2422	8	3.36868	Joint	82	16	286	23.418	Unit 2	Wed Dec 8 14:04:33 2021		Stream	J2	1	0.2	stepped irregular	5
Locality 13	731489	5.31811e+06	-42.2549	173.806	56.5936	6	3.17438	Joint	76	27	297	23.418	Unit 2	Wed Dec 8 14:04:25 2021		Stream	J2	1	0.2	stepped irregular	5
Locality 13	731491	5.31811e+06	-42.2549	173.806	56.1049	6	3.17834	Joint	82	12	282	23.418	Unit 2	Wed Dec 8 14:04:19 2021		Stream	J2	1	0.2	stepped irregular	5
Locality 13	731482	5.31811e+06	-42.2549	173.806	59.6426	6	4.58599	Joint	75	105	15	23.418	Unit 2	Wed Dec 8 14:03:29 2021		Stream	J1	1	0.3	undulating smooth/rough	closed
Locality 13	731479	5.31811e+06	-42.2549	173.806	64.8252	8	4.86217	Joint	73	115	25	23.418	Unit 2	Wed Dec 8 14:03:23 2021		Stream	J1	1	0.3	undulating smooth/rough	closed
Locality 13	731481	5.31811e+06	-42.2549	173.806	64.593	8	4.2986	Joint	71	136	46	23.418	Unit 2	Wed Dec 8 14:03:18 2021		Stream	J1	1	0.3	undulating smooth/rough	closed
Locality 13	731480	5.31812e+06	-42.2548	173.806	58.9186	6	5.03658	Cleavage	57	141	51	23.418	Unit 2	Wed Dec 8 14:02:01 2021		Stream	S1	1.5	0.5	planar/stepped smooth	closed
Locality 13	731480	5.31812e+06	-42.2548	173.806	59.4717	8	6.10724	Cleavage	47	130	40	23.418	Unit 2	Wed Dec 8 14:01:52 2021		Stream	S1	1.5	0.5	planar/stepped smooth	closed
Locality 13	731486	5.31812e+06	-42.2548	173.806	53.0743	12	7.97642	Cleavage	69	112	22	23.418	Unit 2	Wed Dec 8 14:01:36 2021		Stream	S1	1.5	0.5	planar/stepped smooth	closed
Locality 13	731486	5.31811e+06	-42.2548	173.806	52.7395	24	8.38587	Cleavage	62	129	39	23.418	Unit 2	Wed Dec 8 14:01:20 2021		Stream	S1	1.5	0.5	planar/stepped smooth	closed
Locality 12	731556	5.31815e+06	-42.2545	173.807	70.5767	4	3.22155	Cleavage	43	284	194	23.418	Unit 2	Wed Dec 8 13:52:00 2021		Stream	J4	5	0.05	undulating smooth	1
Locality 12	731557	5.31815e+06	-42.2545	173.807	72.8111	6	3.80143	Joint	82	27	297	23.418	Unit 2	Wed Dec 8 13:50:22 2021		Stream	J3	0.7	0.05	undulating stepped	1
Locality 12	731556	5.31815e+06	-42.2545	173.807	72.7563	6	3.86407	Joint	86	209	119	23.418	Unit 2	Wed Dec 8 13:50:16 2021		Stream	J3	0.7	0.05	undulating stepped	1
Locality 12	731556	5.31815e+06	-42.2545	173.807	72.6899	6	3.8798	Joint	66	205	115	23.418	Unit 2	Wed Dec 8 13:50:11 2021		Stream	J3	0.7	0.05	undulating stepped	1
Locality 12	731556	5.31815e+06	-42.2545	173.807	77.6783	4	5.95345	Joint	39	139	49	23.418	Unit 2	Wed Dec 8 13:49:18 2021		Stream	J2	1	0.05	planar smooth	1
Locality 12	731557	5.31815e+06	-42.2545	173.807	77.4645	6	8.74132	Joint	34	193	103	23.418	Unit 2	Wed Dec 8 13:49:05 2021	Vein	Stream	J2	1	0.05	planar smooth	1
Locality 12	731555	5.31815e+06	-42.2545	173.807	64.5819	6	3.51924	Cleavage	77	2	272	23.418	Unit 2	Wed Dec 8 13:46:06 2021		Stream	S1	5	0.01	planar smooth	1
Locality 12	731556	5.31815e+06	-42.2545	173.807	64.0219	6	3.55451	Cleavage	55	7	277	23.418	Unit 2	Wed Dec 8 13:45:56 2021		Stream	S1	5	0.01	planar smooth	1
Locality 12	731554	5.31815e+06	-42.2545	173.807	62.5757	6	3.55189	Cleavage	54	6	276	23.418	Unit 2	Wed Dec 8 13:45:47 2021		Stream	S1	5	0.01	planar smooth	1
Locality 12	731554	5.31815e+06	-42.2545	173.807	61.8081	4	3.52104	Cleavage	56	5	275	23.418	Unit 2	Wed Dec 8 13:45:29 2021		Stream	S1	5	0.01	planar smooth	1
Locality 12	731555	5.31815e+06	-42.2545	173.807	62.4348	4	3.42059	Cleavage	55	11	281	23.418	Unit 2	Wed Dec 8 13:45:22 2021		Stream	S1	5	0.01	planar smooth	1
Locality 12	731559	5.31815e+06	-42.2545	173.807	64.8953	6	4.54375	Joint	88	114	24	23.418	Unit 2	Wed Dec 8 13:42:40 2021		Stream	J1	5	0.2	planar smooth - slickensided	5
Locality 12	731559	5.31815e+06	-42.2545	173.807	64.0899	6	3.98796	Joint	84	116	26	23.418	Unit 2	Wed Dec 8 13:42:28 2021		Stream	J1	5	0.2	planar smooth - slickensided	5
Locality 12	731556	5.31815e+06	-42.2545	173.807	63.5621	8	4.03695	Joint	90	142	52	23.418	Unit 2	Wed Dec 8 13:42:10 2021		Stream	J1	5	0.2	planar smooth - slickensided	5
Locality 12	731555	5.31815e+06	-42.2545	173.807	63.3747	6	3.47357	Joint	88	302	212	23.418	Unit 2	Wed Dec 8 13:41:12 2021		Stream	J1	5	0.2	planar smooth - slickensided	5
Locality 12	731553	5.31815e+06	-42.2545	173.807	63.4967	6	3.64983	Joint	77	105	15	23.418	Unit 2	Wed Dec 8 13:40:28 2021		Stream	J1	5	0.2	planar smooth - slickensided	5
Locality 11	731582	5.31827e+06	-42.2534	173.807	67.5799	6	5.57901	Joint	43	168	78	23.418	Unit 2	Wed Dec 8 13:27:22 2021		Stream	J5	0.5	0.5	planar stepped	closed
Locality 11	731581	5.31827e+06	-42.2534	173.807	68.4823	6	5.15689	Joint	78	178	88	23.418	Unit 2	Wed Dec 8 13:27:16 2021		Stream	J5	0.5	0.5	planar stepped	closed
Locality 11	731582	5.31827e+06	-42.2534	173.807	69.2157	8	5.04867	Joint	51	278	188	23.418	Unit 2	Wed Dec 8 13:26:37 2021		Stream	J4	1	0.1	planar stepped	closed
Locality 11	731582	5.31827e+06	-42.2534	173.807	68.9257	8	5.22509	Joint	61	289	199	23.418	Unit 2	Wed Dec 8 13:26:28 2021		Stream	J4	1	0.1	planar stepped	closed
Locality 11	731581	5.31827e+06	-42.2534	173.807	69.9737	6	4.90543	Joint	54	288	198	23.418	Unit 2	Wed Dec 8 13:26:20 2021		Stream	J4	1	0.1	planar stepped	closed
Locality 11	731581	5.31827e+06	-42.2534	173.807	70.7028	4	4.66627	Joint	54	280	190	23.418	Unit 2	Wed Dec 8 13:26:14 2021		Stream	J4	1	0.1	planar stepped	closed
Locality 11	731584	5.31827e+06	-42.2534	173.807	77.3966	6	5.25878	Joint	3	340	250	23.418	Unit 2	Wed Dec 8 13:25:40 2021		Stream	J3	2	0.1	stepped irregular	closed
Locality 11	731587	5.31827e+06	-42.2534	173.807	77.1201	6	4.2105	Joint	11	328	238	23.418	Unit 2	Wed Dec 8 13:25:25 2021		Stream	J3	2	0.1	stepped irregular	closed
Locality 11	731585	5.31827e+06	-42.2534	173.807	78.7932	12	8.34694	Joint	78	15	285	23.418	Unit 2	Wed Dec 8 13:23:55 2021		Stream	J2	3	1	planar undulating	10
Locality 11	731581	5.31827e+06	-42.2534	173.807	80.5558	8	5.99256	Joint	75	16	286	23.418	Unit 2	Wed Dec 8 13:23:44 2021		Stream	J2	3	1	planar undulating	10
Locality 11	731599	5.3183e+06	-42.2532	173.808	118.135	24	13.8015	Joint	67	355	265	23.418	Unit 2	Wed Dec 8 13:22:20 2021		Stream	J2	3	1	planar undulating	10
Locality 11	731605	5.3183e+06	-42.2531	173.808	134.394	16	17.3066	Joint	47	26	296	23.418	Unit 2	Wed Dec 8 13:22:12 2021		Stream	J1	3	0.5	irregular rough	0
Locality 11	731613	5.31832e+06	-42.2529	173.808	156.305	16	31.4399	Joint	66	44	314	23.418	Unit 2	Wed Dec 8 13:22:03 2021		Stream	J1	3	0.5	irregular rough	0
Locality 10	731623	5.31832e+06	-42.253	173.808	73.3923	6	4.82299	Joint	17	148	58	23.418	Unit 2	Wed Dec 8 13:13:13 2021		Stream	J3	0.5	0.05	planar smooth	1
Locality 10	731615	5.31832e+06	-42.2529	173.808	76.5733	6	4.41636	Joint	18	108	18	23.418	Unit 2	Wed Dec 8 13:12:42 2021		Stream	J3	0.5	0.05	planar smooth	1
Locality 10	731621	5.31832e+06	-42.2529	173.808	68.6302	6	5.92161	Joint	67	314	224	23.418	Unit 2	Wed Dec 8 13:09:25 2021		Stream	J2	2	0.2	stepped planar	1
Locality 10	731621	5.31832e+06	-42.2529	173.808	64.9897	8	6.2078	Joint	77	294	204	23.418	Unit 2	Wed Dec 8 13:08:44 2021		Stream	J2	2	0.2	stepped planar	1
Locality 10	731623	5.31832e+06	-42.253	173.808	66.7062	6	4.06683	Joint	77	295	205	23.418	Unit 2	Wed Dec 8 13:08:29 2021		Stream	J2	2	0.2	stepped planar	1
Locality 10	731624	5.31832e+06	-42.253	173.808	67.3748	8	4.34478	Joint	89	47	317	23.418	Unit 2	Wed Dec 8 13:08:11 2021		Stream	J1	3	0.05	planar rough	2
Locality 10	731621	5.31832e+06	-42.2529	173.808	68.224	6	4.1193	Joint	89	46	316	23.418	Unit 2	Wed Dec 8 13:07:40 2021		Stream	J1	3	0.05	planar rough	2
Locality 10	731623	5.31832e+06	-42.2529	173.808	68.789	8	4.39253	Joint	84	225	135	23.418	Unit 2	Wed Dec 8 13:06:56 2021		Stream	J1	3	0.05	planar rough	2
Locality 10	731621	5.31832e+06	-42.2529	173.808	65.8949	6	3.43403	Joint	85	257	167	23.418	Unit 2	Wed Dec 8 13:05:58 2021		Stream	J1	3	0.05	planar rough	2
Locality 9	731653	5.31833e+06	-42.2529	173.808	66.1165	6	4.20162	Bedding	55	113	23	23.418	Unit 2	Wed Dec 8 13:00:36 2021		Stream	S0	5	0.2	undulating smooth	closed
Locality 9	731653	5.31833e+06	-42.2529	173.808	65.9372	6	4.17543	Bedding	59	112	22	23.418	Unit 2	Wed Dec 8 13:00:29 2021		Stream	S0	5	0.2	undulating smooth	closed
Locality 9	731659	5.31833e+06	-42.2528	173.808	65.7245	6	5.10748	Cleavage	42	84	354	23.418	Unit 2	Wed Dec 8 12:59:29 2021		Stream	S1	2	0.01	undulating smooth	closed
Locality 9	731664	5.31832e+06	-42.2529	173.808	67.0809	8	7.32685	Cleavage	48	2	272	23.418	Unit 2	Wed Dec 8 12:59:15 2021	Sheared sandstone greywacke	Stream	S1	2	0.01	undulating smooth	closed
Locality 8	731639	5.31836e+06	-42.2526	173.808	128.941	8	8.58588	Joint	57	26	296	23.418	Unit 2	Wed Dec 8 12:53:26 2021		Stream
Locality 8	731644	5.31836e+06	-42.2525	173.808	131.059	8	6.98667	Joint	85	89	359	23.418	Unit 2	Wed Dec 8 12:52:50 2021		Stream
Locality 8	731647	5.31837e+06	-42.2525	173.808	130.101	12	9.99729	Joint	51	323	233	23.418	Unit 2	Wed Dec 8 12:51:49 2021		Stream
Locality 8	731646	5.31836e+06	-42.2526	173.808	130.909	8	7.99255	Joint	47	292	202	23.418	Unit 2	Wed Dec 8 12:51:43 2021		Stream
Locality 8	731647	5.31836e+06	-42.2526	173.808	130.263	8	7.31492	Joint	28	269	179	23.418	Unit 2	Wed Dec 8 12:51:33 2021		Stream
Locality 8	731640	5.31836e+06	-42.2526	173.808	128.948	12	7.834	Joint	39	52	322	23.418	Unit 2	Wed Dec 8 12:50:49 2021		Stream
Locality 8	731639	5.31836e+06	-42.2526	173.808	129.5	12	8.01098	Joint	33	147	57	23.418	Unit 2	Wed Dec 8 12:50:45 2021		Stream
Locality 8	731652	5.31837e+06	-42.2525	173.808	122.717	12	7.07034	Joint	87	221	131	23.418	Unit 2	Wed Dec 8 12:49:31 2021		Stream
Locality 8	731652	5.31837e+06	-42.2525	173.808	121.68	8	6.99566	Joint	82	84	354	23.418	Unit 2	Wed Dec 8 12:49:16 2021		Stream
Locality 8	731653	5.31837e+06	-42.2525	173.808	101.159	8	8.30325	Joint	86	305	215	23.418	Unit 2	Wed Dec 8 12:48:04 2021		Stream
Locality 8	731657	5.31837e+06	-42.2525	173.808	105.168	12	7.31453	Joint	83	138	48	23.418	Unit 2	Wed Dec 8 12:47:55 2021		Stream
Locality 8	731661	5.31838e+06	-42.2524	173.808	104.392	12	6.38239	Joint	84	326	236	23.418	Unit 2	Wed Dec 8 12:47:43 2021		Stream
Locality 8	731657	5.31838e+06	-42.2524	173.808	104.333	8	6.39668	Joint	61	342	252	23.418	Unit 2	Wed Dec 8 12:47:36 2021		Stream
Locality 8	731650	5.31839e+06	-42.2523	173.808	105.538	12	11.1053	Joint	55	38	308	23.418	Unit 2	Wed Dec 8 12:46:33 2021		Stream
Locality 8	731650	5.31839e+06	-42.2523	173.808	106.471	12	9.33545	Joint	60	21	291	23.418	Unit 2	Wed Dec 8 12:46:19 2021		Stream
Locality 7	732449	5.31914e+06	-42.2453	173.817	478.398	8	4.91726	Bedding	17	326	236	23.418	Unit 2	Wed Dec 8 11:32:24 2021	Bedding	Landslide	S0	2	2	undulating smooth	closed
Locality 7	732449	5.31914e+06	-42.2453	173.817	478.207	8	4.67353	Bedding	14	321	231	23.418	Unit 2	Wed Dec 8 11:32:18 2021	Bedding	Landslide	S0	2	2	undulating smooth	closed
Locality 7	732448	5.31914e+06	-42.2453	173.817	476.409	6	3.89709	Joint	30	187	97	23.418	Unit 2	Wed Dec 8 11:30:23 2021	Disturbed	Landslide	J3	1	0.6	undulating smooth	obscured
Locality 7	732449	5.31914e+06	-42.2453	173.817	478.961	6	5.011	Joint	23	151	61	23.418	Unit 2	Wed Dec 8 11:30:13 2021	Disturbed	Landslide	J3	1	0.6	undulating smooth	obscured
Locality 7	732447	5.31914e+06	-42.2453	173.817	485.803	8	10.15	Joint	28	121	31	23.418	Unit 2	Wed Dec 8 11:29:55 2021	Disturbed	Landslide	J3	1	0.6	undulating smooth	obscured
Locality 7	732449	5.31914e+06	-42.2453	173.817	477.708	6	3	Joint	77	237	147	23.418	Unit 2	Wed Dec 8 11:25:19 2021	Disturbed	Landslide	J2	0.7	0.8	smooth planar	30
Locality 7	732451	5.31914e+06	-42.2453	173.818	477.368	6	3	Joint	70	236	146	23.418	Unit 2	Wed Dec 8 11:24:56 2021	Disturbed	Landslide	J2	0.7	0.8	smooth planar	30
Locality 7	732451	5.31914e+06	-42.2453	173.818	476.191	4	3	Joint	58	345	255	23.418	Unit 2	Wed Dec 8 11:24:32 2021	Disturbed	Landslide	J1	0.5	0.5	stepped rough	50
Locality 6	732472	5.31912e+06	-42.2455	173.818	452.698	6	5.24167	Joint	56	71	341	23.418	Unit 2	Wed Dec 8 11:11:51 2021		Landslide	J4	1	0.5	undulating rough	closed
Locality 6	732472	5.31912e+06	-42.2455	173.818	452.698	6	5.24167	Joint	35	51	321	23.418	Unit 2	Wed Dec 8 11:03:32 2021		Landslide	J3	0.5	0.5	planar rough	closed
Locality 6	732472	5.31912e+06	-42.2455	173.818	452.698	6	5.24167	Joint	28	66	336	23.418	Unit 2	Wed Dec 8 11:03:19 2021		Landslide	J3	0.5	0.5	planar rough	closed
Locality 6	732472	5.31912e+06	-42.2455	173.818	452.698	6	5.24167	Joint	43	196	106	23.418	Unit 2	Wed Dec 8 11:02:36 2021		Landslide	J2	1	0.2	planar rough	closed
Locality 6	732472	5.31912e+06	-42.2455	173.818	452.698	6	5.24167	Joint	43	248	158	23.418	Unit 2	Wed Dec 8 11:02:15 2021		Landslide	J2	1	0.2	planar rough	closed
Locality 6	732472	5.31912e+06	-42.2455	173.818	452.698	6	5.24167	Joint	87	347	257	23.418	Unit 2	Wed Dec 8 11:01:50 2021		Landslide	J1	1	0.2	undulating smooth	closed
Locality 6	732472	5.31912e+06	-42.2455	173.818	452.698	6	5.24167	Joint	86	155	65	23.418	Unit 2	Wed Dec 8 11:01:34 2021		Landslide	J1	1	0.2	undulating smooth	closed
Locality 5	732438	5.31911e+06	-42.2456	173.817	473.933	8	3.06993	Joint	29	59	329	23.418	Unit 2	Wed Dec 8 10:37:59 2021		Landslide	J2	0.5	0.5	undulating smooth	closed
Locality 5	732440	5.31912e+06	-42.2456	173.817	474.232	8	3.8031	Joint	30	64	334	23.418	Unit 2	Wed Dec 8 10:37:31 2021		Landslide	J2	0.5	0.5	undulating smooth	closed
Locality 5	732442	5.31912e+06	-42.2455	173.817	473.083	8	4.67772	Joint	73	328	238	23.418	Unit 2	Wed Dec 8 10:36:48 2021		Landslide	J1	2	0.2	undulating smooth	1
Locality 5	732441	5.31912e+06	-42.2455	173.817	474.114	8	4.70404	Joint	67	326	236	23.418	Unit 2	Wed Dec 8 10:36:25 2021		Landslide	J1	2	0.2	undulating smooth	1
Locality 5	732441	5.31912e+06	-42.2455	173.817	474.646	12	4.23963	Joint	67	302	212	23.418	Unit 2	Wed Dec 8 10:36:11 2021		Landslide	J1	2	0.2	undulating smooth	1
Locality 4	732436	5.31913e+06	-42.2454	173.817	483.499	8	4.20361	Joint	56	269	179	23.418	Unit 2	Wed Dec 8 10:28:40 2021	Displaced block	Landslide
Locality 4	732437	5.31913e+06	-42.2454	173.817	483.937	8	3.93791	Joint	68	303	213	23.418	Unit 2	Wed Dec 8 10:28:28 2021	Displaced block	Landslide
Locality 4	732435	5.31913e+06	-42.2455	173.817	484.708	6	3	Joint	55	330	240	23.418	Unit 2	Wed Dec 8 10:28:16 2021	Displaced block	Landslide
Locality 3	732392	5.31912e+06	-42.2455	173.817	478.749	8	4.01352	Joint	13	345	255	23.418	Unit 2	Wed Dec 8 09:56:50 2021	shear	Landslide	J3	1	0.5	planar smooth	10
Locality 3	732392	5.31912e+06	-42.2455	173.817	478.925	8	4.204	Joint	17	330	240	23.418	Unit 2	Wed Dec 8 09:56:40 2021	shear	Landslide	J3	1	0.5	planar smooth	10
Locality 3	732393	5.31912e+06	-42.2455	173.817	479.486	8	5.50219	Joint	44	308	218	23.418	Unit 2	Wed Dec 8 09:56:29 2021	shear, dilated	Landslide	J2	2	0.5	stepped undulating	3
Locality 3	732390	5.31912e+06	-42.2455	173.817	478.183	6	3	Joint	47	222	132	23.418	Unit 2	Wed Dec 8 09:50:56 2021	shear, dilated	Landslide	J2	2	0.5	stepped undulating	3
Locality 3	732390	5.31912e+06	-42.2455	173.817	478.134	8	3.07624	Joint	51	210	120	23.418	Unit 2	Wed Dec 8 09:50:45 2021	shear, dilated	Landslide	J2	2	0.5	stepped undulating	3
Locality 3	732392	5.31912e+06	-42.2455	173.817	478.473	8	3.4817	Joint	81	323	233	23.418	Unit 2	Wed Dec 8 09:49:59 2021	dominant	Landslide	J1	1.5	0.1	undulating rough	2
Locality 3	732392	5.31912e+06	-42.2455	173.817	478.23	8	3.69975	Joint	70	324	234	23.418	Unit 2	Wed Dec 8 09:49:40 2021	dominant	Landslide	J1	1.5	0.1	undulating rough	2
Locality 3	732392	5.31912e+06	-42.2456	173.817	478.09	8	3.32525	Joint	76	314	224	23.418	Unit 2	Wed Dec 8 09:49:21 2021	dominant	Landslide	J1	1.5	0.1	undulating rough	2
Locality 3	732392	5.31912e+06	-42.2456	173.817	478.2	8	3.38526	Joint	68	283	193	23.418	Unit 2	Wed Dec 8 09:49:08 2021	dominant	Landslide	J1	1.5	0.1	undulating rough	2
Locality 3	732391	5.31912e+06	-42.2456	173.817	477.859	8	3.22422	Joint	69	267	177	23.418	Unit 2	Wed Dec 8 09:48:55 2021	dominant	Landslide	J1	1.5	0.1	undulating rough	2
Locality 2	732391	5.31913e+06	-42.2455	173.817	484.457	8	3	Joint	17	264	174	23.418	Unit 2	Wed Dec 8 09:45:05 2021		Landslide	J4	1	0.5	undulating / planar stepped	1
Locality 2	732392	5.31913e+06	-42.2455	173.817	485.426	6	3	Joint	15	285	195	23.418	Unit 2	Wed Dec 8 09:44:44 2021		Landslide	J4	1	0.5	undulating / planar stepped	1
Locality 2	732392	5.31913e+06	-42.2454	173.817	485.124	6	3	Joint	17	281	191	23.418	Unit 2	Wed Dec 8 09:44:33 2021		Landslide	J4	1	0.5	undulating / planar stepped	1
Locality 2	732393	5.31913e+06	-42.2455	173.817	483.18	3	3	Bedding	22	4	274	23.418	Unit 2	Wed Dec 8 09:41:56 2021	bedding	Landslide	S0	5	1	undulating smooth	closed
Locality 2	732395	5.31913e+06	-42.2455	173.817	483.284	6	3	Bedding	23	345	255	23.418	Unit 2	Wed Dec 8 09:41:32 2021	bedding	Landslide	S0	5	1	undulating smooth	closed
Locality 2	732393	5.31913e+06	-42.2455	173.817	481.441	4	3	Joint	87	265	175	23.418	Unit 2	Wed Dec 8 09:40:04 2021	conjugate to J2	Landslide	J3	1	0.5	undulating	5
Locality 2	732395	5.31913e+06	-42.2455	173.817	482.16	4	3	Joint	68	226	136	23.418	Unit 2	Wed Dec 8 09:39:52 2021	conjugate to J2	Landslide	J3	1	0.5	undulating	5
Locality 2	732396	5.31912e+06	-42.2455	173.817	484.184	8	4.76161	Joint	71	256	166	23.418	Unit 2	Wed Dec 8 09:34:48 2021	conjugate to J2	Landslide	J3	1	0.5	undulating	5
Locality 2	732394	5.31912e+06	-42.2455	173.817	484.784	8	3	Joint	63	235	145	23.418	Unit 2	Wed Dec 8 09:34:41 2021	conjugate to J2	Landslide	J3	1	0.5	undulating	5
Locality 2	732396	5.31913e+06	-42.2455	173.817	483.905	6	3.17888	Joint	70	350	260	23.418	Unit 2	Wed Dec 8 09:33:28 2021	dominant	Landslide	J1	1	0.3	stepped smooth	1
Locality 2	732396	5.31913e+06	-42.2455	173.817	484.359	4	3	Joint	77	344	254	23.418	Unit 2	Wed Dec 8 09:33:20 2021	dominant	Landslide	J1	1	0.3	stepped smooth	1
Locality 2	732395	5.31913e+06	-42.2455	173.817	484.209	4	3	Joint	78	350	260	23.418	Unit 2	Wed Dec 8 09:33:08 2021	dominant	Landslide	J1	1	0.3	stepped smooth	1
Locality 2	732393	5.31912e+06	-42.2455	173.817	484.119	8	3	Joint	76	92	2	23.418	Unit 2	Wed Dec 8 09:32:46 2021	shear	Landslide	J2	2	1	undulating smooth	10
Locality 2	732393	5.31913e+06	-42.2455	173.817	483.951	8	3	Joint	80	89	359	23.418	Unit 2	Wed Dec 8 09:32:37 2021	shear	Landslide	J2	2	1	undulating smooth	10
Locality 2	732393	5.31913e+06	-42.2455	173.817	482.972	8	3.17634	Joint	89	316	226	23.418	Unit 2	Wed Dec 8 09:31:39 2021	dominant	Landslide	J1	1	0.3	stepped smooth	1
Locality 2	732392	5.31913e+06	-42.2455	173.817	483.136	8	3	Joint	87	319	229	23.418	Unit 2	Wed Dec 8 09:31:28 2021	dominant	Landslide	J1	1	0.3	stepped smooth	1
Locality 2	732394	5.31913e+06	-42.2455	173.817	482.901	8	3	Joint	83	15	285	23.418	Unit 2	Wed Dec 8 09:30:55 2021	dominant	Landslide	J1	1	0.3	stepped smooth	1
Locality 2	732394	5.31913e+06	-42.2455	173.817	483.32	6	3	Joint	80	18	288	23.418	Unit 2	Wed Dec 8 09:30:38 2021	dominant	Landslide	J1	1	0.3	stepped smooth	1
Locality 2	732395	5.31913e+06	-42.2455	173.817	483.519	8	3	Joint	82	23	293	23.418	Unit 2	Wed Dec 8 09:30:19 2021	dominant	Landslide	J1	1	0.3	stepped smooth	1
Locality 1	732345	5.31908e+06	-42.2459	173.816	472.644	4	3	Joint	52	276	186	23.418	Unit 3	Wed Dec 8 08:51:21 2021	Disturbed, dilated	head scarp	J3	0.5	0.5	planar smooth	10
Locality 1	732345	5.31908e+06	-42.2459	173.816	472.727	4	3	Joint	51	254	164	23.418	Unit 3	Wed Dec 8 08:51:01 2021	Disturbed, dilated	head scarp	J3	0.5	0.5	planar smooth	10
Locality 1	732345	5.31908e+06	-42.2459	173.816	472.536	4	3	Joint	37	279	189	23.418	Unit 3	Wed Dec 8 08:50:47 2021	Disturbed, dilated	head scarp	J3	0.5	0.5	planar smooth	10
Locality 1	732343	5.31908e+06	-42.2459	173.816	471.647	6	3	Joint	60	181	91	23.418	Unit 2	Wed Dec 8 08:50:09 2021	Disturbed, dilated	head scarp	J2	1	0.3	planar smooth	10
Locality 1	732342	5.31908e+06	-42.2459	173.816	471.637	4	3	Joint	78	184	94	23.418	Unit 2	Wed Dec 8 08:49:52 2021	Disturbed, dilated	head scarp	J2	1	0.3	planar smooth	10
Locality 1	732343	5.31908e+06	-42.2459	173.816	471.505	4	3	Joint	85	172	82	23.418	Unit 2	Wed Dec 8 08:49:36 2021	Disturbed, dilated	head scarp	J2	1	0.3	planar smooth	10
Locality 1	732343	5.31908e+06	-42.2459	173.816	472.219	4	3	Joint	37	144	54	23.418	Unit 2	Wed Dec 8 08:47:50 2021	Disturbed, dilated	head scarp	J1	1	0.2	planar stepped	10
Locality 1	732343	5.31908e+06	-42.2459	173.816	472.739	4	3	Joint	39	155	65	23.418	Unit 2	Wed Dec 8 08:47:13 2021	Disturbed, dilated	head scarp	J1	1	0.2	planar stepped	10
Locality 0								Joint	77	75					Disturbed	scarp	J3	0.5	0.3	planar undulating	obscure
Locality 0								Joint	70	0					Disturbed	scarp	J2	0.5	0.1	planar undulating	obscure
Locality 0								Joint	72	345					Disturbed	scarp	J1	2	1	planar undulating	10
Locality 0								Joint	55	325					Disturbed	scarp	J1	2	1	planar undulating	10
Locality 0								Joint	75	345					Disturbed	scarp	J1	2	1	planar undulating	10
Locality 0								Bedding	55	320					Disturbed	scarp	S0	2	2	planar undulating	closed
Locality 6	731971	5.31812e+06	-42.2547	173.812	12.9747	4	3	Joint	19	182	92	23.371	Unit 1	Sun Dec 12 13:56:24 2021		shore	J4	1	1	planar irregular	1
Locality 6	731971	5.31812e+06	-42.2547	173.812	13.0993	4	3	Joint	20	184	94	23.371	Unit 1	Sun Dec 12 13:56:08 2021		shore	J4	1	1	planar irregular	1
Locality 6	731974	5.31812e+06	-42.2547	173.812	13.0202	3	3	Joint	75	139	49	23.371	Unit 1	Sun Dec 12 13:52:47 2021		shore	J3	5	0.3	planar smooth	2
Locality 6	731973	5.31811e+06	-42.2547	173.812	14.485	2	3	Joint	58	152	62	23.371	Unit 1	Sun Dec 12 13:52:20 2021		shore	J3	5	0.3	planar smooth	2
Locality 6	731968	5.31811e+06	-42.2547	173.812	13.711	2	3	Joint	69	145	55	23.371	Unit 1	Sun Dec 12 13:51:22 2021		shore	J3	5	0.3	planar smooth	2
Locality 6	731970	5.31811e+06	-42.2547	173.812	13.5175	4	3	Joint	64	156	66	23.371	Unit 1	Sun Dec 12 13:50:44 2021		shore	J3	5	0.3	planar smooth	2
Locality 6	731968	5.31811e+06	-42.2547	173.812	13.2375	4	3	Joint	76	293	203	23.371	Unit 1	Sun Dec 12 13:45:55 2021		shore	J2	3	0.1	planar rough	5
Locality 6	731968	5.31811e+06	-42.2547	173.812	13.6035	3	3	Joint	70	295	205	23.371	Unit 1	Sun Dec 12 13:45:10 2021		shore	J2	3	0.1	planar rough	5
Locality 6	731971	5.31812e+06	-42.2547	173.812	12.3918	3	3	Joint	53	279	189	23.371	Unit 1	Sun Dec 12 13:43:57 2021		shore	J2	3	0.1	planar rough	5
Locality 6	731970	5.31811e+06	-42.2547	173.812	11.004	4	3	Joint	90	227	137	23.371	Unit 1	Sun Dec 12 13:42:08 2021		shore	J1	10	0.1	undulating irregular	5
Locality 6	731969	5.31811e+06	-42.2547	173.812	10.8415	4	3	Joint	88	44	314	23.371	Unit 1	Sun Dec 12 13:41:42 2021		shore	J1	10	0.1	undulating irregular	5
Locality 6	731970	5.31812e+06	-42.2547	173.812	10.8901	4	3	Joint	88	222	132	23.371	Unit 1	Sun Dec 12 13:41:29 2021		shore	J1	10	0.1	undulating irregular	5
Locality 6	731974	5.31811e+06	-42.2547	173.812	10.2938	2	3	Joint	81	49	319	23.371	Unit 1	Sun Dec 12 13:40:46 2021		shore	J1	10	0.1	undulating irregular	5
Locality 5	732056	5.31816e+06	-42.2543	173.813	14.0886	3	3	Joint	79	282	192	23.371	Unit 1	Sun Dec 12 13:31:56 2021		shore	J1	10	0.5	planar irregular - smooth	2
Locality 5	732056	5.31816e+06	-42.2543	173.813	15.0845	3	3	Joint	72	247	157	23.371	Unit 1	Sun Dec 12 13:31:42 2021		shore	J1	10	0.5	planar irregular - smooth	2
Locality 5	732061	5.31816e+06	-42.2543	173.813	14.2141	4	3	Joint	73	255	165	23.371	Unit 1	Sun Dec 12 13:30:26 2021		shore	J1	10	0.5	planar irregular - smooth	2
Locality 5	732061	5.31816e+06	-42.2543	173.813	14.199	3	3	Joint	68	248	158	23.371	Unit 1	Sun Dec 12 13:30:16 2021		shore	J1	10	0.5	planar irregular - smooth	2
Locality 5	732060	5.31816e+06	-42.2543	173.813	14.6321	3	3	Joint	81	262	172	23.371	Unit 1	Sun Dec 12 13:30:06 2021		shore	J1	10	0.5	planar irregular - smooth	2
Locality 4	732074	5.31817e+06	-42.2542	173.813	14.0079	4	3	Joint	86	62	332	23.371	Unit 1	Sun Dec 12 13:28:09 2021		shore	J5	1	2	stepped smooth	2
Locality 4	732074	5.31817e+06	-42.2542	173.813	14.0977	4	3	Joint	84	67	337	23.371	Unit 1	Sun Dec 12 13:27:51 2021		shore	J5	1	2	stepped smooth	2
Locality 4	732074	5.31817e+06	-42.2542	173.813	14.1554	4	3	Joint	90	61	331	23.371	Unit 1	Sun Dec 12 13:27:36 2021		shore	J5	1	2	stepped smooth	2
Locality 4	732075	5.31817e+06	-42.2542	173.813	14.0413	4	3	Joint	83	295	205	23.371	Unit 1	Sun Dec 12 13:23:41 2021		shore	J4	2	0.2	planar smooth	1
Locality 4	732075	5.31817e+06	-42.2542	173.813	14.5754	3	3	Joint	78	283	193	23.371	Unit 1	Sun Dec 12 13:23:16 2021		shore	J4	2	0.2	planar smooth	1
Locality 4	732076	5.31817e+06	-42.2542	173.813	14.9871	4	3	Joint	74	290	200	23.371	Unit 1	Sun Dec 12 13:22:35 2021		shore	J4	2	0.2	planar smooth	1
Locality 4	732076	5.31817e+06	-42.2542	173.813	13.8235	4	3	Joint	34	291	201	23.371	Unit 1	Sun Dec 12 13:16:12 2021		shore	J3	1	0.5	planar rough	closed
Locality 4	732074	5.31817e+06	-42.2542	173.813	13.9852	4	3	Joint	70	214	124	23.371	Unit 1	Sun Dec 12 13:15:27 2021		shore	J1	2	0.3	undulating smooth	1
Locality 4	732074	5.31817e+06	-42.2542	173.813	15.141	4	3	Joint	69	180	90	23.371	Unit 1	Sun Dec 12 13:14:47 2021		shore	J1	2	0.3	undulating smooth	1
Locality 4	732074	5.31817e+06	-42.2542	173.813	14.8854	4	3	Joint	71	43	313	23.371	Unit 1	Sun Dec 12 13:13:32 2021		shore	J2	2	1	undulating rough	5
Locality 4	732072	5.31817e+06	-42.2542	173.813	15.1364	3	3	Joint	63	12	282	23.371	Unit 1	Sun Dec 12 13:12:41 2021		shore	J2	2	1	undulating rough	5
Locality 4	732075	5.31817e+06	-42.2542	173.813	14.6178	4	3	Joint	70	216	126	23.371	Unit 1	Sun Dec 12 13:10:48 2021		shore	J1	2	0.3	undulating smooth	1
Locality 4	732074	5.31817e+06	-42.2542	173.813	14.5594	4	3	Joint	72	219	129	23.371	Unit 1	Sun Dec 12 13:10:39 2021		shore	J1	2	0.3	undulating smooth	1
Locality 4	732073	5.31817e+06	-42.2542	173.813	14.2201	4	3	Joint	64	209	119	23.371	Unit 1	Sun Dec 12 13:10:20 2021		shore	J1	2	0.3	undulating smooth	1
Locality 3	732120	5.31821e+06	-42.2538	173.814	11.6369	4	3	Joint	62	356	266	23.371	Unit 1	Sun Dec 12 12:57:26 2021		shore	J4	1	1	planar rough	1
Locality 3	732119	5.31821e+06	-42.2538	173.814	11.7681	3	3	Joint	55	338	248	23.371	Unit 1	Sun Dec 12 12:57:12 2021		shore	J4	1	1	planar rough	1
Locality 3	732112	5.31821e+06	-42.2538	173.814	10.4819	4	3	Joint	9	297	207	23.371	Unit 1	Sun Dec 12 12:56:25 2021		shore	J3	3	0.5	undulating rough	2
Locality 3	732111	5.31821e+06	-42.2538	173.814	11.2906	4	3	Joint	9	338	248	23.371	Unit 1	Sun Dec 12 12:56:10 2021		shore	J3	3	0.5	undulating rough	2
Locality 3	732113	5.31821e+06	-42.2538	173.814	12.4578	4	3	Joint	56	185	95	23.371	Unit 1	Sun Dec 12 12:55:43 2021		shore	J1	2	0.2	planar rough	2
Locality 3	732114	5.31821e+06	-42.2538	173.814	14.9669	4	3	Joint	80	140	50	23.371	Unit 1	Sun Dec 12 12:54:03 2021		shore	J1	2	0.2	planar rough	2
Locality 3	732114	5.31821e+06	-42.2538	173.814	14.4994	3	3	Joint	75	139	49	23.371	Unit 1	Sun Dec 12 12:53:47 2021		shore	J1	2	0.2	planar rough	2
Locality 3	732119	5.31822e+06	-42.2537	173.814	14.5594	4	3	Joint	75	159	69	23.371	Unit 1	Sun Dec 12 12:52:44 2021		shore	J1	2	0.2	planar rough	2
Locality 3	732119	5.31822e+06	-42.2537	173.814	13.9596	6	3	Joint	65	59	329	23.371	Unit 1	Sun Dec 12 12:51:46 2021		shore	J2	3	0.2	undulating rough	5
Locality 3	732119	5.31821e+06	-42.2538	173.814	14.3654	3	3	Joint	74	83	353	23.371	Unit 1	Sun Dec 12 12:51:27 2021		shore	J2	3	0.2	undulating rough	5
Locality 3	732119	5.31821e+06	-42.2538	173.814	14.1588	3	3	Joint	72	122	32	23.371	Unit 1	Sun Dec 12 12:51:19 2021		shore	J2	3	0.2	undulating rough	5
Locality 2	732331	5.31831e+06	-42.2528	173.816	23.9829	4	3	Joint	32	58	328	23.371	Unit 1	Sun Dec 12 12:24:44 2021		shore	J3	2	1	undulating smooth	obscured
Locality 2	732330	5.31831e+06	-42.2528	173.816	24.0292	4	3	Joint	69	43	313	23.371	Unit 1	Sun Dec 12 12:24:25 2021		shore	J3	2	1	undulating smooth	obscured
Locality 2	732328	5.31831e+06	-42.2528	173.816	23.5625	4	3	Joint	18	355	265	23.371	Unit 1	Sun Dec 12 12:23:47 2021		shore	J4	1	0.3	planar rough	obscured
Locality 2	732327	5.31831e+06	-42.2528	173.816	23.2947	4	3	Joint	16	351	261	23.371	Unit 1	Sun Dec 12 12:23:17 2021		shore	J4	1	0.3	planar rough	obscured
Locality 2	732330	5.31832e+06	-42.2528	173.816	25.5369	6	3	Joint	89	22	292	23.371	Unit 1	Sun Dec 12 12:15:55 2021		shore	J2	2	0.2	planar smooth	5
Locality 2	732330	5.31831e+06	-42.2528	173.816	24.8138	4	3	Joint	88	24	294	23.371	Unit 1	Sun Dec 12 12:15:38 2021		shore	J2	2	0.2	planar smooth	5
Locality 2	732329	5.31831e+06	-42.2528	173.816	24.9068	4	3	Joint	83	22	292	23.371	Unit 1	Sun Dec 12 12:15:14 2021		shore	J2	2	0.2	planar smooth	5
Locality 2	732327	5.31831e+06	-42.2528	173.816	25.8132	6	3	Joint	87	259	169	23.371	Unit 1	Sun Dec 12 12:14:00 2021		shore	J1	3	0.5	planar smooth	5
Locality 2	732327	5.31831e+06	-42.2528	173.816	26.0416	4	3	Joint	84	77	347	23.371	Unit 1	Sun Dec 12 12:13:48 2021		shore	J1	3	0.5	planar smooth	5
Locality 2	732327	5.31831e+06	-42.2528	173.816	27.3988	4	3	Joint	85	61	331	23.371	Unit 1	Sun Dec 12 12:13:27 2021		shore	J1	3	0.5	planar smooth	5
Locality 2	732330	5.31831e+06	-42.2528	173.816	28.4052	4	3	Joint	85	88	358	23.371	Unit 1	Sun Dec 12 12:12:52 2021		shore	J1	3	0.5	planar smooth	5
Locality 2	732331	5.31831e+06	-42.2528	173.816	28.4343	4	3	Joint	89	79	349	23.371	Unit 1	Sun Dec 12 12:12:38 2021		shore	J1	3	0.5	planar smooth	5
Locality 1	732357	5.3183e+06	-42.2529	173.817	16.757	6	3	Joint	26	171	81	23.371	Unit 1	Sun Dec 12 12:09:11 2021		shore	J5	2	1	planar rough	2
Locality 1	732356	5.3183e+06	-42.2529	173.817	15.6938	6	3	Joint	33	189	99	23.371	Unit 1	Sun Dec 12 12:09:01 2021		shore	J5	2	1	planar rough	2
Locality 1	732356	5.31831e+06	-42.2529	173.817	17.7529	4	3	Joint	31	314	224	23.371	Unit 1	Sun Dec 12 12:04:36 2021		shore	J4	3	0.5	undulating rough	1
Locality 1	732353	5.3183e+06	-42.2529	173.817	17.497	4	3	Joint	21	163	73	23.371	Unit 1	Sun Dec 12 12:03:50 2021		shore	J4	3	0.5	undulating rough	1
Locality 1	732357	5.3183e+06	-42.2529	173.817	19.085	4	3	Joint	68	73	343	23.371	Unit 1	Sun Dec 12 12:02:53 2021		shore	J3	3	0.5	planar irregular	1
Locality 1	732358	5.3183e+06	-42.2529	173.817	19.0293	4	3	Joint	64	119	29	23.371	Unit 1	Sun Dec 12 12:02:15 2021		shore	J3	3	0.5	planar irregular	1
Locality 1	732357	5.3183e+06	-42.2529	173.817	19.2309	6	3	Joint	72	120	30	23.371	Unit 1	Sun Dec 12 12:01:56 2021		shore	J3	3	0.5	planar irregular	1
Locality 1	732357	5.3183e+06	-42.2529	173.817	19.2637	4	3	Joint	74	133	43	23.371	Unit 1	Sun Dec 12 12:01:41 2021		shore	J3	3	0.5	planar irregular	1
Locality 1	732354	5.3183e+06	-42.2529	173.817	21.1665	6	3	Joint	73	245	155	23.371	Unit 1	Sun Dec 12 11:53:44 2021		shore	J2	1	1	planar rough	1
Locality 1	732355	5.3183e+06	-42.2529	173.817	21.8388	4	3	Joint	85	260	170	23.371	Unit 1	Sun Dec 12 11:53:18 2021		shore	J1	10	5	planar stepped	1
Locality 1	732354	5.3183e+06	-42.2529	173.817	21.5201	4	3	Joint	90	259	169	23.371	Unit 1	Sun Dec 12 11:52:50 2021		shore	J1	10	5	planar stepped	1
Locality 4	732366	5.3183e+06	-42.253	173.817	13.4359	6	3	Joint	23	164	74	23.4578	Unit 1	Sun Dec 12 11:34:22 2021		shore	J3	1	0.2	planar rough	2
Locality 4	732366	5.3183e+06	-42.2529	173.817	13.5566	6	3	Joint	20	163	73	23.4578	Unit 1	Sun Dec 12 11:34:11 2021		shore	J3	1	0.2	planar rough	2
Locality 4	732366	5.3183e+06	-42.253	173.817	13.6507	6	3	Joint	22	217	127	23.4578	Unit 1	Sun Dec 12 11:34:02 2021		shore	J3	1	0.2	planar rough	2
Locality 4	732368	5.3183e+06	-42.2529	173.817	13.4615	6	3	Joint	72	29	299	23.4578	Unit 1	Sun Dec 12 11:32:29 2021		shore	J2	2	0.5	planar rough	5
Locality 4	732368	5.3183e+06	-42.2529	173.817	13.1351	8	3	Joint	79	19	289	23.4578	Unit 1	Sun Dec 12 11:32:01 2021		shore	J2	2	0.5	planar rough	5
Locality 4	732367	5.3183e+06	-42.2529	173.817	13.2946	8	3	Joint	76	26	296	23.4578	Unit 1	Sun Dec 12 11:31:54 2021		shore	J2	2	0.5	planar rough	5
Locality 4	732367	5.3183e+06	-42.2529	173.817	13.5578	8	3	Joint	74	34	304	23.4578	Unit 1	Sun Dec 12 11:31:44 2021		shore	J2	2	0.5	planar rough	5
Locality 4	732367	5.3183e+06	-42.2529	173.817	13.6642	8	3	Joint	73	31	301	23.4578	Unit 1	Sun Dec 12 11:31:39 2021		shore	J2	2	0.5	planar rough	5
Locality 4	732364	5.3183e+06	-42.2529	173.817	13.6412	6	3	Joint	68	100	10	23.4578	Unit 1	Sun Dec 12 11:30:56 2021		shore	J1	2	1	planar smooth	1
Locality 4	732366	5.3183e+06	-42.2529	173.817	13.1839	6	3	Joint	69	114	24	23.4578	Unit 1	Sun Dec 12 11:30:31 2021		shore	J1	2	1	planar smooth	1
